# Supplementary material
Source: publisher site journal article supplement (https://www.dovepress.com/article/496537)
Supplement: Supplementary file 1 [file get_supplementary_file.php]

# Novel nanozyme-based multicomponent *in situ* hydrogels with antibacterial, hypoxia-relieving and proliferative properties for promoting gastrostomy tube tract maturation

*Feng Xiao1, *, Bisong Yan2, *, Tianwen Yuan2, Yang He2, Xiaojun Zhang3, Xiaoyun He1, Wei Peng1, Ying Xu3, Jun Cao,1,4*

1 Shanghai Eighth People's Hospital, Xuhui District, Shanghai, China, 200030;

2 Department of Interventional Oncology, Dahua Hospital, Xuhui District, Shanghai, China, 200237;

3 College of Pharmacy, Jiangsu University, Zhenjiang, China, 212013;

4 Shanghai University of Medicine and Health Science, Pudong New Area, Shanghai, 201318.

***These authors contributed equally to this work.

Results：

Figure S1. DLS analysis of n-MO (particle size based on volume and number).

Figure S2. The fluorescence intensity of the RDPP solution without n-MO and H2O2 under pH 7.4 or4.0.

Figure S3. TNF-α, IL-1β, and IL-6 concentrations of control and MO-HPA1.0 hydrogels treated group (*p < 0.05, **p < 0.01***p < 0.001, 95% CI, n=3).


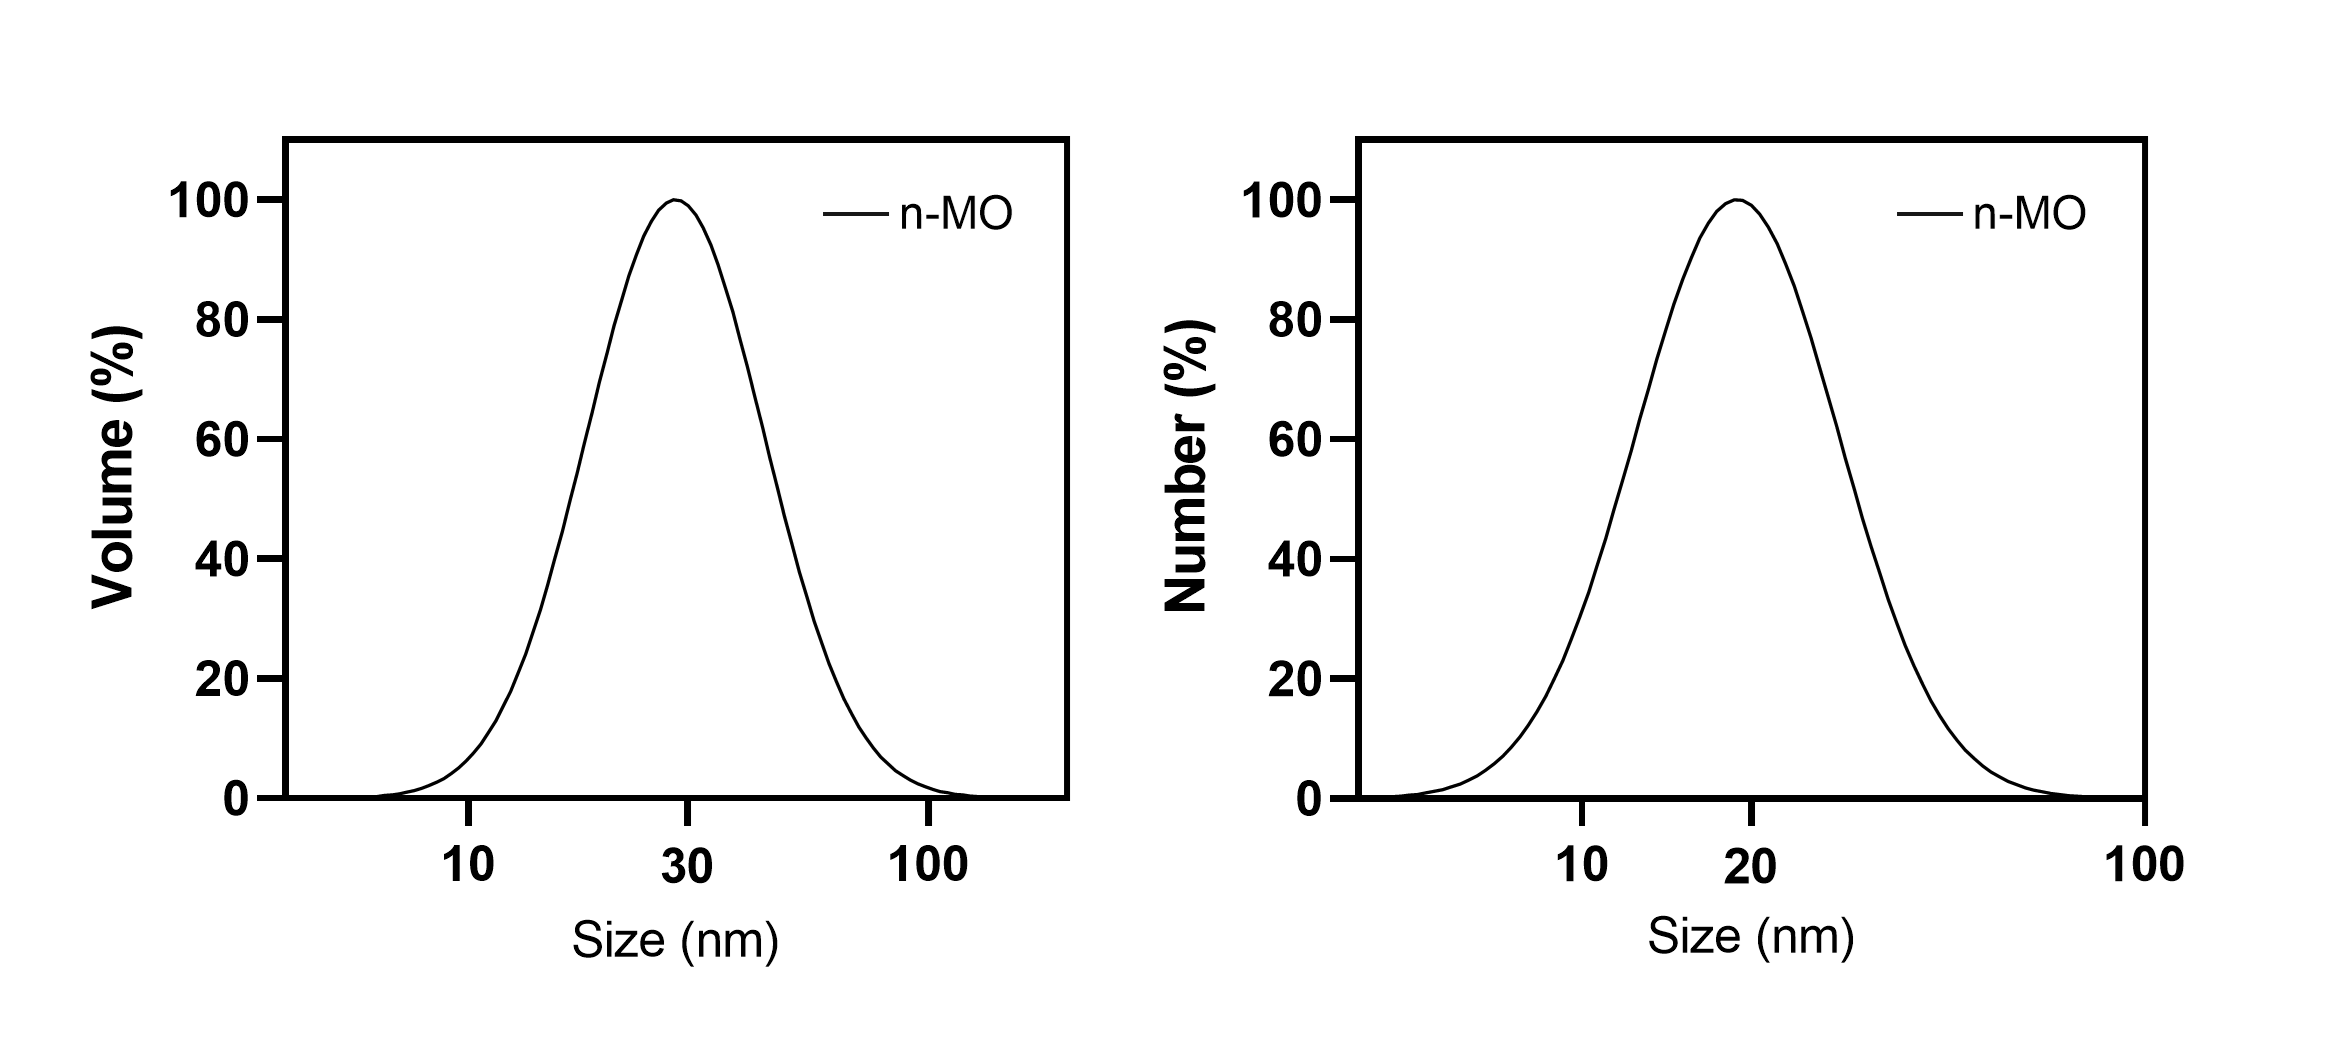


Figure S1. DLS analysis of n-MO (particle size based on volume and number).

Figure S2. The fluorescence intensity of the RDPP solution without n-MO and H2O2 under pH 7.4 or 4.0.


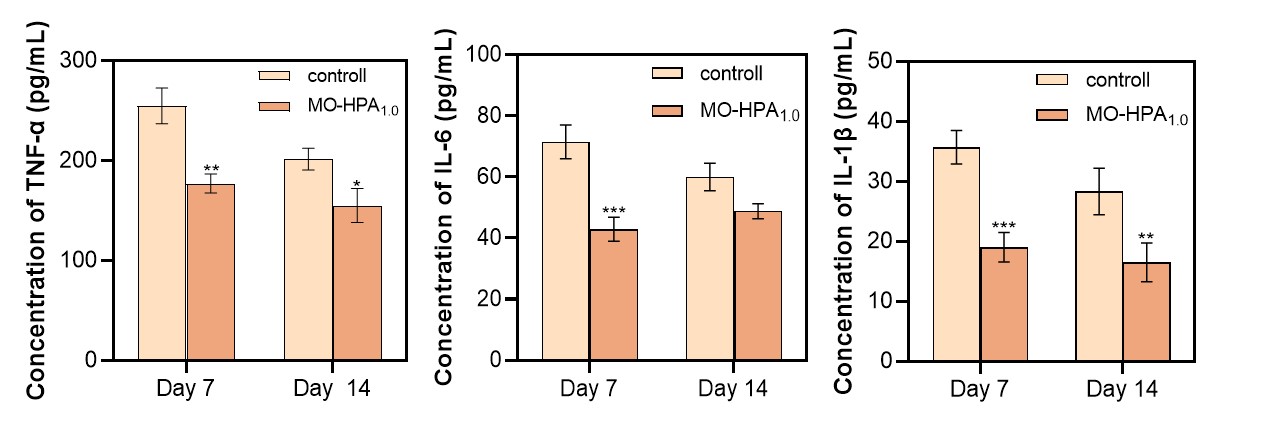


Figure S3. TNF-α, IL-1β, and IL-6 concentrations of control and MO-HPA1.0 hydrogels treated group (*p < 0.05, **p < 0.01***p < 0.001, 95% CI, n=3).
